# Supplementary material for: Histone H2B.8 compacts flowering plant sperm through chromatin phase separation
Source: PubMed Central journal article supplement (PMC9668745; doi:10.1038/s41586-022-05386-6), 2022-11-02
Supplement: 41586_2022_5386_MOESM1_ESM.pdf [file 41586_2022_5386_MOESM1_ESM.pdf]

---

**Supplementary information**

---

**Histone H2B.8 compacts flowering plant sperm through chromatin phase separation**

---

In the format provided by the  
authors and unedited

Extended Data Figure 1a - Rep1 H3K9me2

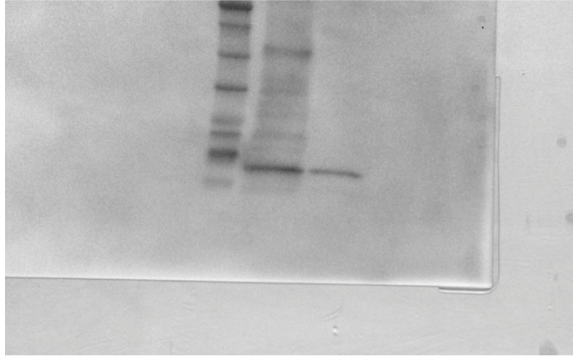

Extended Data Figure 1a - Rep1 H3

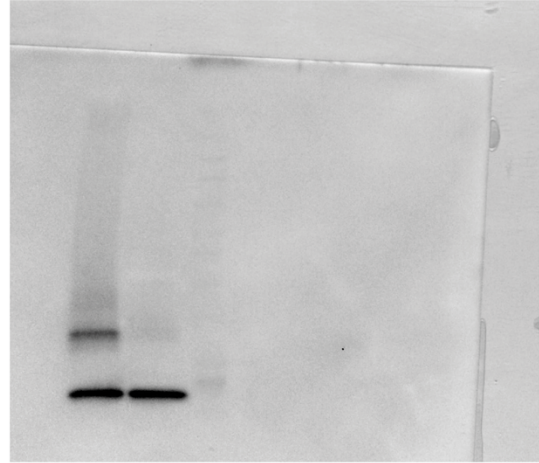

Extended Data Figure 1a - Rep2 H3K9me2

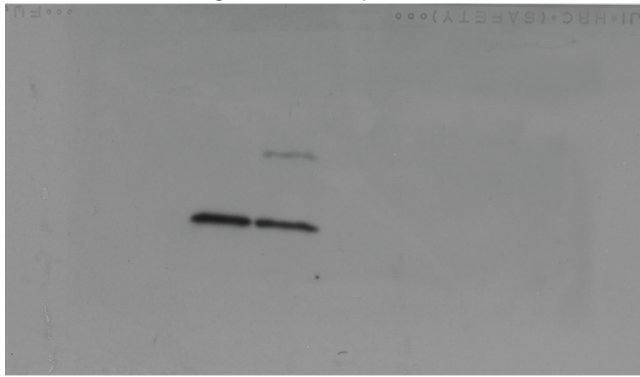

Extended Data Figure 1a - Rep2 H3

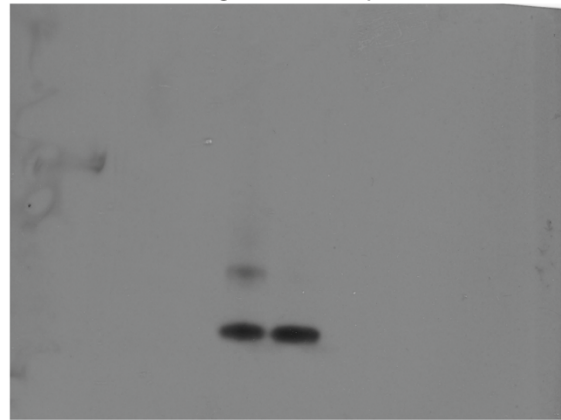

Extended Data Figure 3c - H2B.2 and H2B.8

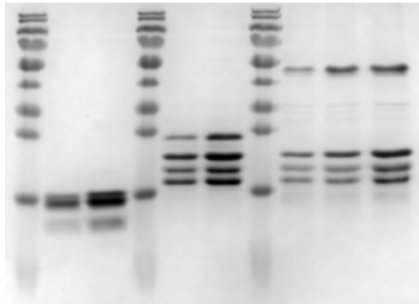

Extended Data Figure 3c - H2B.8ΔIDR

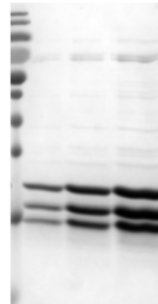

Extended Data Figure 3c - H2B.8-scrambledIDR

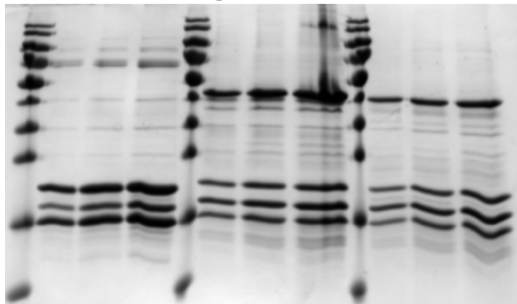

**Supplementary Figure 1.** Source data for blots or gels in Extended Data Figure 1a and Extended Data Figure 3c.

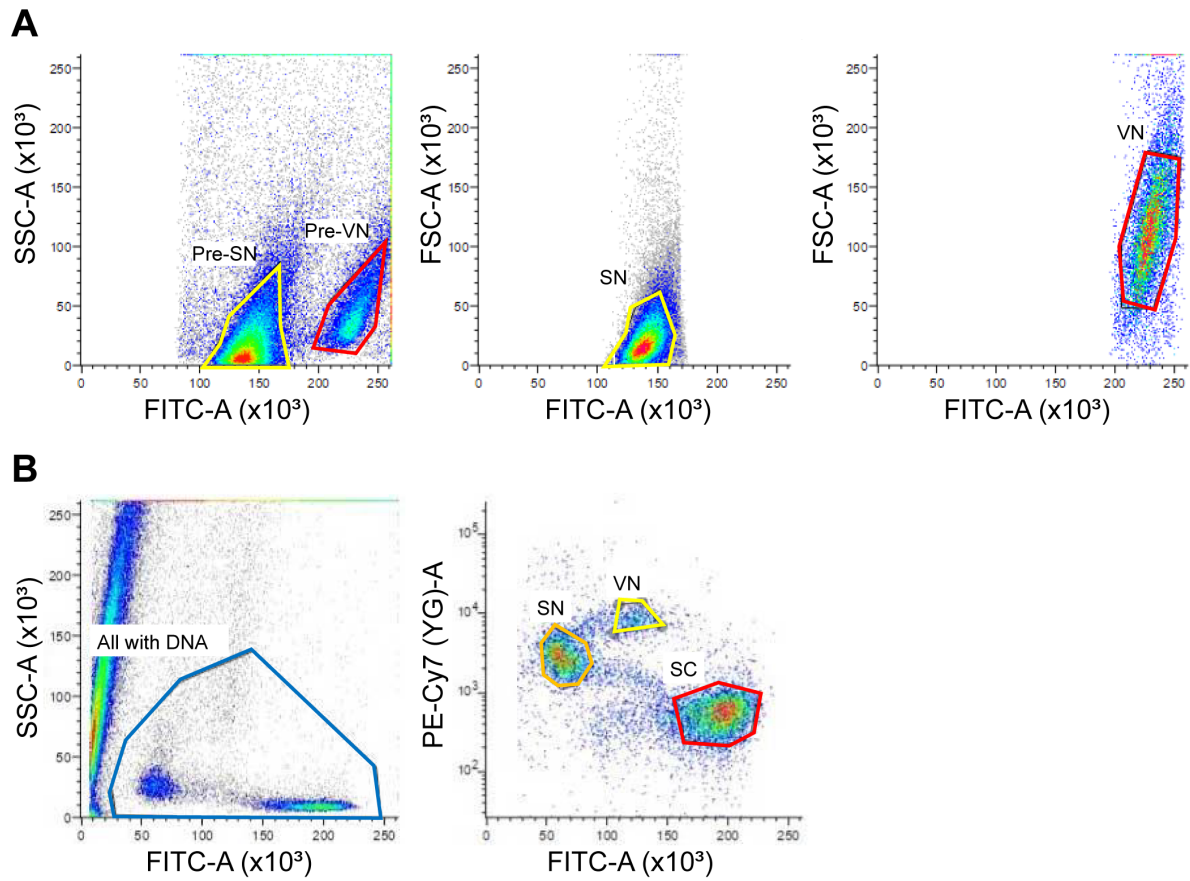

**Supplementary Figure 2.** Example FACS scatterplots showing (A) the gating strategy to isolate sperm (SN) and vegetative (VN) nuclei by SYBR Green intensity (FITC-A) and side scatter area (SSC-A) and then by forward scatter area (FSC-A) and (B) the gating used to purify sperm cells (SC) from pollen by first gating for all events with DNA by SYBR Green intensity (FITC-A) and side-scatter (SSC-A) and then against SYTOX Orange staining (PE-Cy7 (YG)-A).

**Supplementary Table 1.** List of H2B.8 homologs identified in flowering plant species.

File attached.

**Supplementary Table 2.** Multivariate linear regression modelling of H2B.8. The table lists the regression weight for each variable in the multivariate linear regression models (MLR1 and MLR2) of H2B.8. The formula and adjusted R<sup>2</sup> for both models are shown (P-value < 0.001, F-statistic, for all variables in both models). Additionally, for each variable, a separate model was made to predict H2B.8 and the adjusted R<sup>2</sup> value is listed.

| <b>MLR1</b>                                                                                                                                                                                                                                                      | <b>H3K4me3</b>           | <b>Log<sub>10</sub><br/>(RPKM+1)</b> | <b>GC</b>                   | <b>H3K9me2</b> | <b>H1.1</b>     | <b>H1.2</b>       | <b>H2A.W</b> |
|------------------------------------------------------------------------------------------------------------------------------------------------------------------------------------------------------------------------------------------------------------------|--------------------------|--------------------------------------|-----------------------------|----------------|-----------------|-------------------|--------------|
| Regression weight                                                                                                                                                                                                                                                | -0.276                   | -0.334                               | -1.654                      | 0.017          | -0.176          | -0.129            | 0.017        |
| Adjusted R <sup>2</sup>                                                                                                                                                                                                                                          | 0.360                    | 0.342                                | 0.205                       | 0.021          | 0.110           | 0.124             | 0.013        |
| <b>MLR1</b>                                                                                                                                                                                                                                                      | <b>H2A.Z</b>             | <b>H3.1</b>                          | <b>H3.3</b>                 | <b>H3K27ac</b> | <b>H3K27me1</b> | <b>H3K27me3</b>   | <b>mCG</b>   |
| Regression weight                                                                                                                                                                                                                                                | 0.204                    | -0.154                               | 0.240                       | 0.079          | 0.122           | 0.088             | 0.231        |
| Adjusted R <sup>2</sup>                                                                                                                                                                                                                                          | 0.001                    | 0.016                                | 0.012                       | 0.077          | 0.033           | 0.022             | 0.002        |
| MLR1: H2B.8 = 1 - 0.276×H3K4me3 - 0.334×Log10(RPKM+1) - 1.654×GC + 0.017×H3K9me2 - 0.176×H1.1 - 0.129×H1.2 + 0.017×H2A.W + 0.204×H2A.Z - 0.154×H3.1 + 0.240×H3.3 + 0.079×H3K27ac + 0.122×H3K27me1 + 0.088×H3K27me3 + 0.231×mCG (Adjusted R <sup>2</sup> = 0.567) |                          |                                      |                             |                |                 |                   |              |
| <b>MLR2</b>                                                                                                                                                                                                                                                      | <b>gene<br/>TPM&gt;5</b> | <b>gene TPM<br/>1-5</b>              | <b>gene<br/>TPM<br/>0-1</b> | <b>euTE</b>    | <b>hetTE</b>    | <b>intergenic</b> |              |
| Regression weight                                                                                                                                                                                                                                                | -0.933                   | -0.791                               | -0.097                      | 0.613          | -0.190          | 0.666             |              |
| Adjusted R <sup>2</sup>                                                                                                                                                                                                                                          | 0.183                    | 0.091                                | 0.0001                      | 0.061          | 0.0008          | 0.209             |              |
| MLR2: H2B.8 = - 0.074 - 0.933×gene (TPM>5) - 0.791×gene (TPM 1-5) - 0.097×gene (TPM 0-1) + 0.613×euTE - 0.190×hetTE + 0.666×intergenic (Adjusted R <sup>2</sup> = 0.422)                                                                                         |                          |                                      |                             |                |                 |                   |              |

**Supplementary Table 3.** *h2b.8* transmission data. *h2b.8*<sup>+/-</sup>, heterozygous *h2b.8* mutant; *P* value, Fisher's exact test. Results shown in the first two rows were obtained from one reciprocal crossing experiment performed by one researcher, and those from the third row were obtained from a separate experiment performed by an independent researcher.

| <b>Maternal parent</b>      | <b>Paternal parent</b>      | <b>Total F1 progeny</b> | <b>WT F1 progeny</b> | <b><i>h2b.8</i><sup>+/-</sup> F1 progeny</b> | <b>Ratio (WT: <i>h2b.8</i><sup>+/-</sup>)</b> | <b><i>h2b.8</i> transmission (%)</b> | <b><i>P</i> value</b> |
|-----------------------------|-----------------------------|-------------------------|----------------------|----------------------------------------------|-----------------------------------------------|--------------------------------------|-----------------------|
| Wild type                   | <i>h2b.8</i> <sup>+/-</sup> | 575                     | 333                  | 242                                          | 1:0.73                                        | 42.09                                | 0.0078                |
| <i>h2b.8</i> <sup>+/-</sup> | Wild type                   | 574                     | 278                  | 296                                          | 1:1.06                                        | 51.57                                | 0.6367                |
| Wild type                   | <i>h2b.8</i> <sup>+/-</sup> | 743                     | 436                  | 307                                          | 1:0.70                                        | 41.32                                | 0.0009                |

**Supplementary Table 4.** *In vitro* germination assay of wild-type and *h2b.8* mutant pollen.

| <b>Rep</b> | <b>Genotype</b> | <b>Elongated (%)</b> | <b>Germinated (%)</b> | <b>Not germinated (%)</b> |
|------------|-----------------|----------------------|-----------------------|---------------------------|
| 1          | WT              | 85.37                | 5.11                  | 9.52                      |
| 2          | WT              | 80.9                 | 4.33                  | 14.77                     |
| 3          | WT              | 81.74                | 6.27                  | 11.99                     |
| 4          | WT              | 80.49                | 7.38                  | 12.13                     |
| 5          | WT              | 85.51                | 3.25                  | 11.24                     |
| 6          | WT              | 85.73                | 2.07                  | 12.2                      |
| Average    | WT              | 83.29                | 4.74                  | 11.97                     |
| 1          | <i>h2b.8</i>    | 85.4                 | 3.32                  | 11.28                     |
| 2          | <i>h2b.8</i>    | 86.98                | 2.22                  | 10.79                     |
| 3          | <i>h2b.8</i>    | 86.36                | 2.91                  | 10.73                     |
| 4          | <i>h2b.8</i>    | 77.08                | 6.25                  | 16.67                     |
| 5          | <i>h2b.8</i>    | 85.81                | 1.92                  | 12.28                     |
| 6          | <i>h2b.8</i>    | 82.87                | 3.69                  | 13.44                     |
| Average    | <i>h2b.8</i>    | 84.08                | 3.39                  | 12.53                     |

**Supplementary Table 5.** Segregation among progeny from self-pollinated *h2b.8* heterozygous mutant plants.

| <b>Selfed F1 plant</b> | <b>F2 #<br/>WT</b> | <b>F2 #<br/><i>h2b.8</i> +/-</b> | <b>F2 #<br/><i>h2b.8</i> -/-</b> | <b>Total F2 #</b> |
|------------------------|--------------------|----------------------------------|----------------------------------|-------------------|
| 1                      | 97                 | 174                              | 85                               | 356               |
| 2                      | 103                | 190                              | 88                               | 381               |
| 3                      | 93                 | 193                              | 97                               | 383               |
| 4                      | 64                 | 192                              | 86                               | 342               |
| total                  | 357                | 749                              | 356                              | 1462              |

**Supplementary Table 6.** List of primers used in this study.

| <b>Primer name</b>                                  | <b>Sequence (5' - 3')</b>                                     | <b>Purpose</b>                    | <b>Construct</b>                              |
|-----------------------------------------------------|---------------------------------------------------------------|-----------------------------------|-----------------------------------------------|
| <b>H2B.8 CRISPR sgRNA</b>                           |                                                               |                                   |                                               |
| TB201                                               | TGTGGTCTCAATTGACAATCA<br>AAGTAACCGTCAGTTTAAGAG<br>CTATGCTGGAA | H2B.8 sgRNA 1                     | pICSL4723 with 4 H2B.8<br>sgRNA via pICH47751 |
| TB202                                               | TGTGGTCTCAATTGAAGTAAC<br>CGTCACGGAAGAGTTTAAGAG<br>CTATGCTGGAA | H2B.8 sgRNA 2                     | pICSL4723 with 4 H2B.8<br>sgRNA via pICH47761 |
| TB203                                               | TGTGGTCTCAATTGGGATCTCC<br>TTCTTCCGTGAGTTTAAGAGCT<br>ATGCTGGAA | H2B.8 sgRNA 3                     | pICSL4723 with 4 H2B.8<br>sgRNA via pICH47772 |
| TB204                                               | TGTGGTCTCAATTGCTGTCTCG<br>GTGATCACACAGTTTAAGAGC<br>TATGCTGGAA | H2B.8 sgRNA 4                     | pICSL4723 with 4 H2B.8<br>sgRNA via pICH47781 |
| <b>H2B.8 CRISPR screening</b>                       |                                                               |                                   |                                               |
| SH335                                               | CCACCGCGTAGTAGACAG                                            | H2B.8 forward<br>primer           | N/A                                           |
| SH336                                               | AAGCGGGAGTTTCCGGTG                                            | H2B.8 reverse<br>primer           | N/A                                           |
| SH337                                               | GCTAAGGTATTTCGAACGAC                                          | H2B.8 CRISPR<br>sequencing primer | N/A                                           |
| TB296                                               | AGGTCGTCGTCGTAGGTGTC                                          | Cas9 forward<br>primer            | N/A                                           |
| TB297                                               | GTGCAGACCTACAACCAGCT                                          | Cas9 reverse primer               | N/A                                           |
| <b><i>h2b.8-1</i> and <i>h2b.8-2</i> genotyping</b> |                                                               |                                   |                                               |



|                                                                              |                                                              |                                                          |                                                                                      |
|------------------------------------------------------------------------------|--------------------------------------------------------------|----------------------------------------------------------|--------------------------------------------------------------------------------------|
| TB298                                                                        | AGTAGACAGTTAATCACCAAT<br>GCTAAGGTA                           | <i>h2b.8-1</i> dCAPS<br>genotyping forward<br>nested PCR | N/A                                                                                  |
| TB299                                                                        | TGATCACACACGGATCTCCTTC<br>CTCCGTGA                           | <i>h2b.8-1</i> dCAPS<br>genotyping reverse<br>nested PCR | N/A                                                                                  |
| TB293                                                                        | AGTAGACAGTTAATCACCAAT<br>GCTAAGGTA                           | <i>h2b.8-1</i> dCAPS<br>genotyping forward               | N/A                                                                                  |
| TB294                                                                        | TGATCACACACGGATCTCCTTC<br>CTCCGTGA                           | <i>h2b.8-1</i> dCAPS<br>genotyping reverse               | N/A                                                                                  |
| TB335                                                                        | GTGAAAGGGTGATCGTGGTG                                         | <i>h2b.8-2</i> genotyping<br>forward                     | N/A                                                                                  |
| TB336                                                                        | TGGCGGGAGATGAGTATAGG                                         | <i>h2b.8-2</i> genotyping<br>reverse                     | N/A                                                                                  |
| <b>Reporter and ectopic H2B.8 cloning (Multisite Gateway cloning system)</b> |                                                              |                                                          |                                                                                      |
| TB137                                                                        | GGGGACAACCTTTGTATAGAAA<br>AGTTGATCAGTGGAGGATGAC<br>ATGGC     | H2B.8 promoter<br>cloning forward<br>with attB4 site     | <i>pH2B.8::H2B.8-eGFP</i> /<br><i>pH2B.8::H2B.8-Myc</i>                              |
| TB138                                                                        | GGGGACTGCTTTTTTGTACAAA<br>CTTGATTCTTCGTTAGAAATAA<br>CCG      | H2B.8 promoter<br>cloning reverse with<br>attB1r site    | <i>pH2B.8::H2B.8-eGFP</i> /<br><i>pH2B.8::H2B.8-Myc</i>                              |
| TB139                                                                        | GGGGACAAGTTTGTACAAAAA<br>AGCAGGCTATGGCGCCGAGAA<br>AACCAAAGGT | H2B.8 cloning<br>forward with attB1<br>site              | <i>pH2B.8::H2B.8-eGFP</i> /<br><i>pH2B.8::H2B.8-Myc</i> /<br><i>p35S::H2B.8-eGFP</i> |
| TB140                                                                        | GGGGACCACTTTGTACAAGAA<br>AGCTGGGTAACGTTTCCTACTA<br>TCATAACCA | H2B.8 cloning<br>reverse with attB2<br>site              | <i>pH2B.8::H2B.8-eGFP</i> /<br><i>pH2B.8::H2B.8-Myc</i> /<br><i>p35S::H2B.8-eGFP</i> |

---

**H2B.8ΔIDR and H2B.2 cloning (In-Fusion cloning system)**

---

|       |                        |                     |                              |
|-------|------------------------|---------------------|------------------------------|
| SH469 | TATGACCATGATTACGAATTAT | H2B.8ΔIDR           | <i>p35S::H2B.8ΔIDR-YFP /</i> |
|       | CAGTGGAGGATGACATGGCG   | overlapping forward | <i>pH2B.8::H2B.8ΔIDR-</i>    |
|       |                        | N-terminus          | <i>eGFP</i>                  |
| SH475 | TCAAAGTGCCGACGGTTACTTT | H2B.8ΔIDR           | <i>p35S::H2B.8ΔIDR-YFP /</i> |
|       | GATTGTCTCTTCC          | overlapping reverse | <i>pH2B.8::H2B.8ΔIDR-</i>    |
|       |                        | N-terminus          | <i>eGFP</i>                  |
| SH476 | AGTAACCGTCGGCACTTTGAA  | H2B.8ΔIDR           | <i>p35S::H2B.8ΔIDR-YFP /</i> |
|       | GAAAACAGATAAGG         | forward C-terminus  | <i>pH2B.8::H2B.8ΔIDR-</i>    |
|       |                        |                     | <i>eGFP</i>                  |
| SH474 | CTCGCCCTTGCTCACGGATCCC | H2B.8ΔIDR reverse   | <i>p35S::H2B.8ΔIDR-YFP /</i> |
|       | AGATCTTCCTCAGAGATGAGC  | C-terminus          | <i>pH2B.8::H2B.8ΔIDR-</i>    |
|       |                        |                     | <i>eGFP</i>                  |
| TB333 | TCTATCTCTCTCGAGGTACCAT | H2B.2 cloning       | <i>p35S::H2B.2-YFP</i>       |
|       | GGCGAAGGCAGATAAGAAA    | forward             |                              |
| TB335 | TGTCGACTCCGAATTCAGAAC  | H2B.2 cloning       | <i>p35S::H2B.2-YFP</i>       |
|       | TCGTAAACTTCGTAACCGC    | reverse             |                              |

---

**Chimeric H2B.8 construct cloning (Multisite Gateway cloning system)**

---

|        |                        |                         |                             |
|--------|------------------------|-------------------------|-----------------------------|
| PSH295 | GGGGACCACTTTGTACAAGAA  | <i>H2B.8 with N234K</i> | <i>pH2B.8::H2B.8-N234K-</i> |
|        | AGCTGGGTAAGAACTCGTAAA  | substitution            | <i>Myc</i>                  |
|        | CTTCGTAACAGCTTTAGAGCCT |                         |                             |
|        | TC                     |                         |                             |

---

**H2B.8 IDR swap construct cloning (In-Fusion cloning system)**

---

|        |                        |                     |                           |
|--------|------------------------|---------------------|---------------------------|
| PSZ644 | ACAAATCTATCTCTCTCGAGGT | H2B.8-EWSR1         | <i>p35S::H2B.8-EWSR1-</i> |
|        | ACCATGGCGCCGAGAAAACCA  | overlapping forward | <i>IDR-eGFP</i>           |
|        | AAG                    | N-terminus          |                           |

|        |                                                        |                                                  |                                    |
|--------|--------------------------------------------------------|--------------------------------------------------|------------------------------------|
| PSZ650 | CCGTGGACGCGACGGTTACTT<br>TGATTGTCTCTTCC                | H2B.8-EWSR1<br>overlapping reverse<br>N-terminus | <i>p35S::H2B.8-EWSR1-IDR -eGFP</i> |
| PSZ651 | AGTAACCGTCGCGTCCACGGA<br>TTACAGTACC                    | H2B.8-EWSR1<br>overlapping forward<br>EWSR1-IDR  | <i>p35S::H2B.8-EWSR1-IDR -eGFP</i> |
| PSZ652 | TCAAAGTGCCCTGCCATAAA<br>CACCCATGC                      | H2B.8-EWSR1<br>overlapping reverse<br>EWSR1-IDR  | <i>p35S::H2B.8-EWSR1-IDR -eGFP</i> |
| PSZ653 | TTATGGGCAGGGCACTTTGAA<br>GAAAACAGATAAGG                | H2B.8-EWSR1<br>overlapping forward<br>C-terminus | <i>p35S::H2B.8-EWSR1-IDR -eGFP</i> |
| PSZ645 | ACTAGTGTCGACTCCGAATTC<br>ACGTTTCCTACTATCATAACCA<br>ACG | H2B.8-EWSR1<br>overlapping reverse<br>C-terminus | <i>p35S::H2B.8-EWSR1-eGFP</i>      |
| PSZ644 | ACAAATCTATCTCTCTCGAGGT<br>ACCATGGCGCCGAGAAAACCA<br>AAG | H2B.8-TAF15<br>overlapping forward<br>N-terminus | <i>p35S::H2B.8-TAF15-IDR -eGFP</i> |
| PSZ666 | CAGAATCCGAGACGGTTACTT<br>TGATTGTCTCTTCC                | H2B.8-TAF15<br>overlapping reverse<br>N-terminus | <i>p35S::H2B.8-TAF15-IDR -eGFP</i> |
| PSZ667 | AGTAACCGTCTCGGATTCTGG<br>AAGTTACGG                     | H2B.8-TAF15<br>overlapping forward<br>TAF15-IDR  | <i>p35S::H2B.8-TAF15-IDR -eGFP</i> |
| PSZ668 | TCAAAGTGCCTTGTGAATGAT<br>AGGACTGCTGG                   | H2B.8-TAF15<br>overlapping reverse<br>TAF15-IDR  | <i>p35S::H2B.8-TAF15-IDR -eGFP</i> |

|        |                                                        |                                                  |                                                 |
|--------|--------------------------------------------------------|--------------------------------------------------|-------------------------------------------------|
| PSZ669 | TCATTCACAAGGCACTTTGAA<br>GAAAACAGATAAGG                | H2B.8-TAF15<br>overlapping forward<br>C-terminus | <i>p35S::H2B.8-TAF15-IDR</i><br><i>-eGFP</i>    |
| PSZ645 | ACTAGTGTCGACTCCGAATTC<br>ACGTTTCCTACTATCATAACCA<br>ACG | H2B.8-TAF15<br>overlapping reverse<br>C-terminus | <i>p35S::H2B.8-TAF15-IDR</i><br><i>-eGFP</i>    |
| PSZ690 | TCTATCTCTCTCGAGGTACCAT<br>GGCTCCTAGAAAGCCTAAGGT        | H2B.8-<br>scrambledIDR<br>forward                | <i>p35S::H2B.8-</i><br><i>scrambledIDR-eGFP</i> |
| PSZ691 | TGTCGACTCCGAATTCTCTCTT<br>TCTAGAATCATATCCAACA          | H2B.8-<br>scrambledIDR<br>reverse                | <i>p35S::H2B.8-</i><br><i>scrambledIDR-eGFP</i> |

---

**Supplementary Table 7.** List of *P*-values associated with statistical tests in this study.

| <b>Figure</b> | <b>Group 1</b>                         | <b>Group 2</b>                    | <b>P value</b> |
|---------------|----------------------------------------|-----------------------------------|----------------|
| Fig. 1b       | GN                                     | Leaf                              | 0              |
|               | Sperm                                  | Leaf                              | 0              |
|               | Sperm                                  | GN                                | 0              |
| Fig. 2a       | <i>h2b.8-1</i>                         | WT                                | 0              |
|               | <i>h2b.8-2</i>                         | WT                                | 0              |
|               | <i>pH2B.8::H2B.8-eGFP h2b.8-1</i>      | WT                                | 0.8040364      |
|               | <i>pH2B.8::H2B.8-Myc h2b.8-1</i>       | WT                                | 0.7102341      |
|               | <i>pH2B.8::H2B.8ΔIDR-eGFP h2b.8-1</i>  | WT                                | 0              |
|               | <i>pH2B.8::H2B.8-N234K-Myc h2b.8-1</i> | WT                                | 0.5549251      |
|               | <i>h2b.8-2</i>                         | <i>h2b.8-1</i>                    | 0.4003808      |
|               | <i>pH2B.8::H2B.8-eGFP h2b.8-1</i>      | <i>h2b.8-1</i>                    | 0              |
|               | <i>pH2B.8::H2B.8-Myc h2b.8-1</i>       | <i>h2b.8-1</i>                    | 0              |
|               | <i>pH2B.8::H2B.8ΔIDR-eGFP h2b.8-1</i>  | <i>h2b.8-1</i>                    | 0.9980652      |
|               | <i>pH2B.8::H2B.8-N234K-Myc h2b.8-1</i> | <i>h2b.8-1</i>                    | 0              |
|               | <i>pH2B.8::H2B.8-eGFP h2b.8-1</i>      | <i>h2b.8-2</i>                    | 0              |
|               | <i>pH2B.8::H2B.8-Myc h2b.8-1</i>       | <i>h2b.8-2</i>                    | 0              |
|               | <i>pH2B.8::H2B.8ΔIDR-eGFP h2b.8-1</i>  | <i>h2b.8-2</i>                    | 0.9233628      |
|               | <i>pH2B.8::H2B.8-N234K-Myc h2b.8-1</i> | <i>h2b.8-2</i>                    | 0              |
|               | <i>pH2B.8::H2B.8-Myc h2b.8-1</i>       | <i>pH2B.8::H2B.8-eGFP h2b.8-1</i> | 0.9999862      |
|               | <i>pH2B.8::H2B.8ΔIDR-eGFP h2b.8-1</i>  | <i>pH2B.8::H2B.8-eGFP h2b.8-1</i> | 0              |
|               | <i>pH2B.8::H2B.8-N234K-Myc h2b.8-1</i> | <i>pH2B.8::H2B.8-eGFP h2b.8-1</i> | 0.9993517      |
|               | <i>pH2B.8::H2B.8ΔIDR-eGFP h2b.8-1</i>  | <i>pH2B.8::H2B.8-Myc h2b.8-1</i>  | 0              |
|               | <i>pH2B.8::H2B.8-N234K-Myc h2b.8-1</i> | <i>pH2B.8::H2B.8-Myc h2b.8-1</i>  | 0.9999006      |
|               | <i>pH2B.8::H2B.8ΔIDR-eGFP</i>          |                                   |                |
|               | <i>pH2B.8::H2B.8-N234K-Myc h2b.8-1</i> | <i>h2b.8-1</i>                    | 0.92866346     |

|                           |                                       |                               |           |
|---------------------------|---------------------------------------|-------------------------------|-----------|
| Fig. 2d                   | <i>p35S::H2B.8-eGFP</i> #3            | WT                            | 0.002157  |
|                           | <i>p35S::H2B.8-eGFP</i> #5            | WT                            | 0.0003166 |
|                           | <i>p35S::H2B.8ΔIDR-YFP</i> #2         | WT                            | 0.9870122 |
|                           | <i>p35S::H2B.8ΔIDR-YFP</i> #5         | WT                            | 0.9987245 |
|                           | <i>p35S::H2B.2-YFP</i> #8             | WT                            | 0.9890218 |
|                           | <i>p35S::H2B.2-YFP</i> #9             | WT                            | 0.9999989 |
|                           | <i>p35S::H2B.8-eGFP</i> #5            | <i>p35S::H2B.8-eGFP</i> #3    | 0.9993084 |
|                           | <i>p35S::H2B.8ΔIDR-YFP</i> #2         | <i>p35S::H2B.8-eGFP</i> #3    | 0.0268405 |
|                           | <i>p35S::H2B.8ΔIDR-YFP</i> #5         | <i>p35S::H2B.8-eGFP</i> #3    | 0.012598  |
|                           | <i>p35S::H2B.2-YFP</i> #8             | <i>p35S::H2B.8-eGFP</i> #3    | 0.0235015 |
|                           | <i>p35S::H2B.2-YFP</i> #9             | <i>p35S::H2B.8-eGFP</i> #3    | 0.0011189 |
|                           | <i>p35S::H2B.8ΔIDR-YFP</i> #2         | <i>p35S::H2B.8-eGFP</i> #5    | 0.0054939 |
|                           | <i>p35S::H2B.8ΔIDR-YFP</i> #5         | <i>p35S::H2B.8-eGFP</i> #5    | 0.0023178 |
|                           | <i>p35S::H2B.2-YFP</i> #8             | <i>p35S::H2B.8-eGFP</i> #5    | 0.0046637 |
|                           | <i>p35S::H2B.2-YFP</i> #9             | <i>p35S::H2B.8-eGFP</i> #5    | 0.0001511 |
|                           | <i>p35S::H2B.8ΔIDR-YFP</i> #5         | <i>p35S::H2B.8ΔIDR-YFP</i> #2 | 0.9999712 |
|                           | <i>p35S::H2B.2-YFP</i> #8             | <i>p35S::H2B.8ΔIDR-YFP</i> #2 | 1         |
|                           | <i>p35S::H2B.2-YFP</i> #9             | <i>p35S::H2B.8ΔIDR-YFP</i> #2 | 0.9666131 |
|                           | <i>p35S::H2B.2-YFP</i> #8             | <i>p35S::H2B.8ΔIDR-YFP</i> #5 | 0.9999847 |
|                           | <i>p35S::H2B.2-YFP</i> #9             | <i>p35S::H2B.8ΔIDR-YFP</i> #5 | 0.9943575 |
| <i>p35S::H2B.2-YFP</i> #9 | <i>p35S::H2B.2-YFP</i> #8             | 0.970609                      |           |
| Fig. 5c                   | No change                             | Down                          | 0         |
|                           | Up                                    | Down                          | 0         |
|                           | Up                                    | No change                     | 0         |
| Fig. 5e                   | WT sperm                              | Generative nucleus            | 0         |
|                           | <i>h2b.8</i> sperm                    | Generative nucleus            | 0.1425682 |
|                           | <i>pH2B.8::H2B.8ΔIDR-eGFP h2b.8-1</i> | Generative nucleus            | 0.1395767 |

|           |                                       |                         |             |
|-----------|---------------------------------------|-------------------------|-------------|
|           | <i>h2b.8</i> sperm                    | WT sperm                | 0.000001    |
|           | <i>pH2B.8::H2B.8ΔIDR-eGFP h2b.8-1</i> | WT sperm                | 0.0000003   |
|           | <i>pH2B.8::H2B.8ΔIDR-eGFP h2b.8-1</i> | <i>h2b.8</i> sperm      | 0.9998871   |
| Fig. 5f   | WT                                    | <i>p35S::H2B.8-eGFP</i> | 0           |
| Extended  |                                       |                         |             |
| Data Fig. |                                       |                         |             |
| 2b        | WT sperm                              | Generative nucleus      | 0           |
|           | <i>h2b.8-1</i> sperm                  | Generative nucleus      | 0           |
|           | <i>h2b.8-2</i> sperm                  | Generative nucleus      | 0           |
|           | <i>h2b.8-1</i> sperm                  | WT sperm                | 0           |
|           | <i>h2b.8-2</i> sperm                  | WT sperm                | 0           |
|           | <i>h2b.8-2</i> sperm                  | <i>h2b.8-1</i> sperm    | 0.4120998   |
| Extended  |                                       |                         |             |
| Data Fig. |                                       |                         |             |
| 2d        | WT                                    | <i>h2b.8</i>            | 3.64E-07    |
| Extended  |                                       |                         |             |
| Data Fig. |                                       |                         |             |
| 2e        | WT                                    | <i>h2b.8</i>            | 6.44E-14    |
| Extended  |                                       |                         |             |
| Data Fig. |                                       |                         |             |
| 2h        | Small (left plot)                     | Large (left plot)       | 0.00002294  |
|           | Small (middle plot)                   | Large (middle plot)     | 0.000052222 |
|           | Small (right plot)                    | Large (right plot)      | 0.6789      |
| Extended  |                                       |                         |             |
| Data Fig. |                                       |                         |             |
| 3h        | <i>p35S::H2B.8-eGFP</i>               | WT                      | 0.028352    |

|                                      |                                  |           |
|--------------------------------------|----------------------------------|-----------|
| <i>p35S::H2B.8-scrambledIDR-eGFP</i> | WT                               | 0.0181214 |
| <i>p35S::H2B.8-EWSR1-IDR-eGFP</i>    | WT                               | 0.0299781 |
| <i>p35S::H2B.8-TAF15-IDR-eGFP</i>    | WT                               | 0.0306313 |
| <i>p35S::H2B.8-scrambledIDR-eGFP</i> | <i>p35S::H2B.8-eGFP</i>          | 0.9999277 |
| <i>p35S::H2B.8-EWSR1-IDR-eGFP</i>    | <i>p35S::H2B.8-eGFP</i>          | 0.9967316 |
| <i>p35S::H2B.8-TAF15-IDR-eGFP</i>    | <i>p35S::H2B.8-eGFP</i>          | 0.9966074 |
|                                      | <i>p35S::H2B.8-scrambledIDR-</i> |           |
| <i>p35S::H2B.8-EWSR1-IDR-eGFP</i>    | <i>eGFP</i>                      | 0.9886906 |
|                                      | <i>p35S::H2B.8-scrambledIDR-</i> |           |
| <i>p35S::H2B.8-TAF15-IDR-eGFP</i>    | <i>eGFP</i>                      | 0.9883868 |
|                                      | <i>p35S::H2B.8-EWSR1-IDR-</i>    |           |
| <i>p35S::H2B.8-TAF15-IDR-eGFP</i>    | <i>eGFP</i>                      | 1         |

---
